# Supplementary material for: Microglia are required for protection against lethal coronavirus encephalitis in mice
Source: JCI journal article supplement (doi:10.1172/jci97229), 2018-01-28
Supplement: sd1 [file 1]

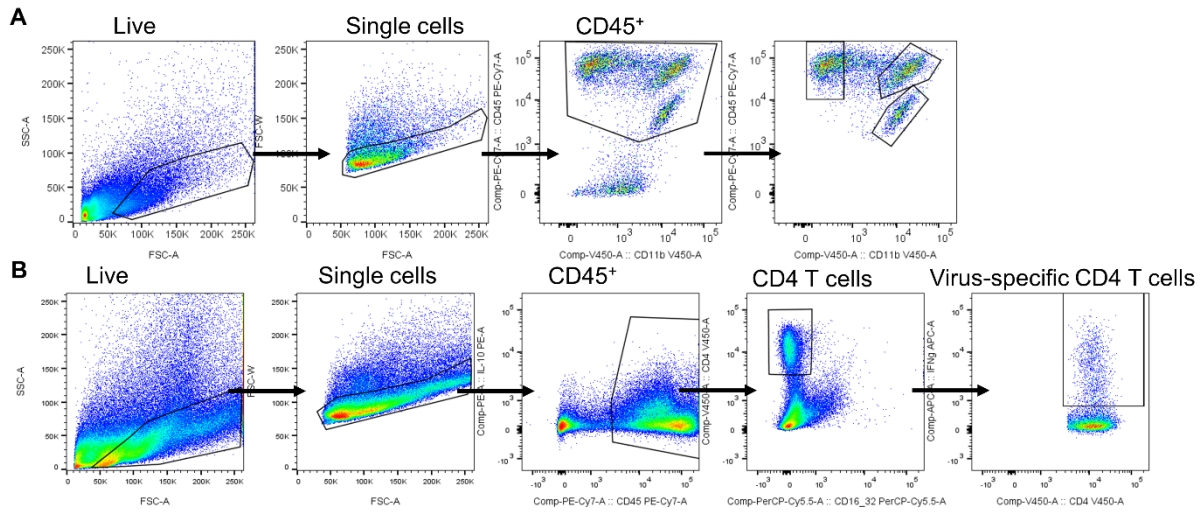

**Figure S1. Gating strategies used.** Seven days after infection, brain cells were isolated from untreated mice, and stained with antibodies to cell markers. Data were acquired on a FACS-Verse and analyzed using the gating strategies shown in the figure. (A) Gating of microglia, macrophages, and lymphocytes. (B) Gating strategy for virus-specific CD4 T cells. CD8 T cells were gated in the same manner.

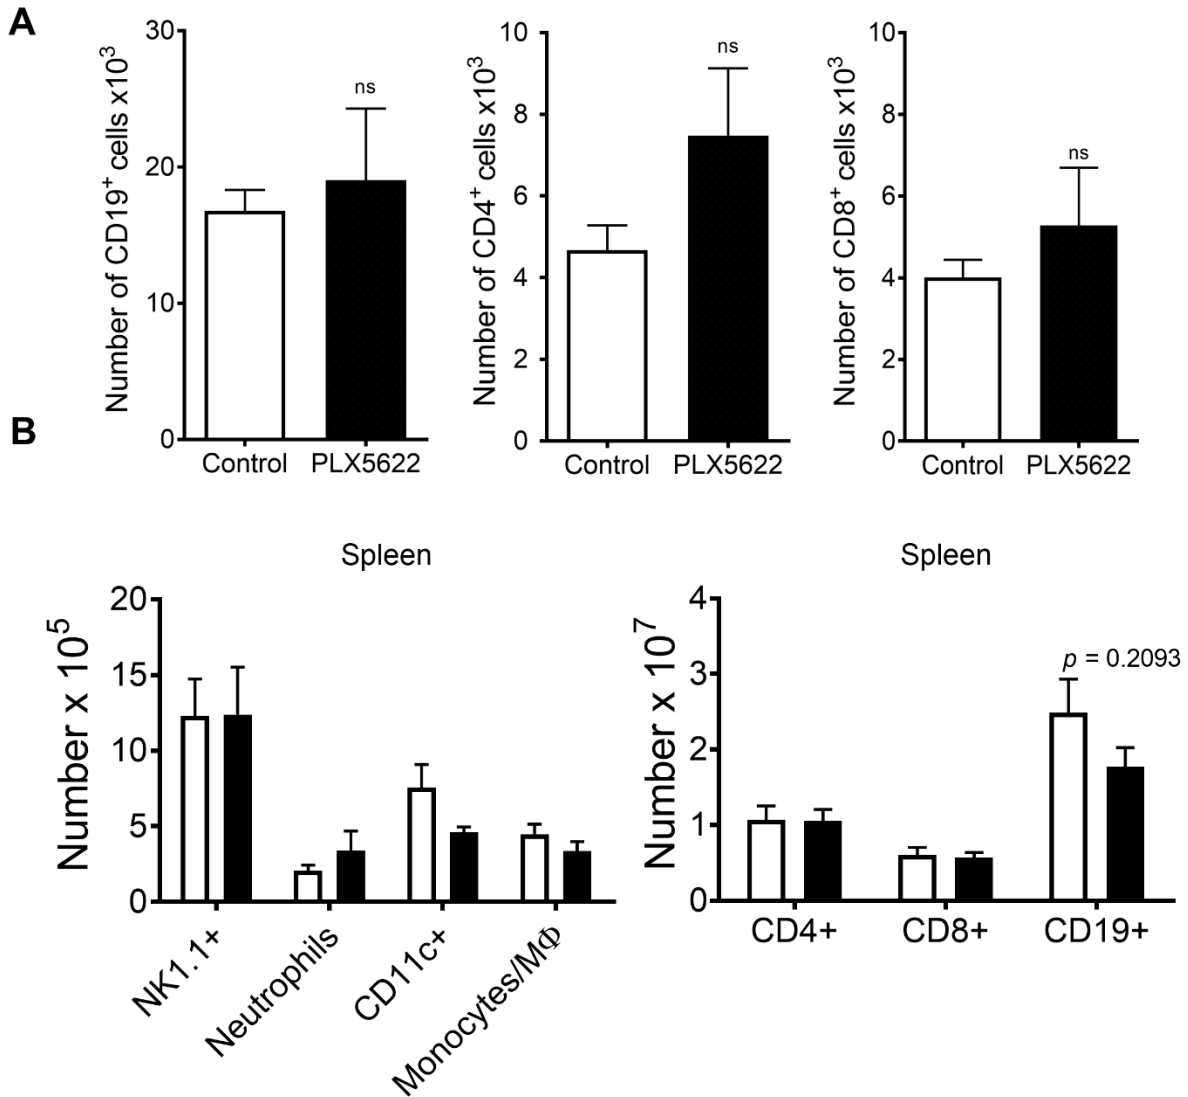

**Figure S2.** Mice were treated with PLX5622 or control feed for 7 days. (A) CD19<sup>+</sup> B cells, CD4 and CD8 T cell numbers in the brain. (B) Total numbers of indicated cell types isolated from spleens after treatment with PLX5622. Data are representative of 2 independent experiments with 5 mice per group. Statistical significance determined by Mann Whitney U tests.

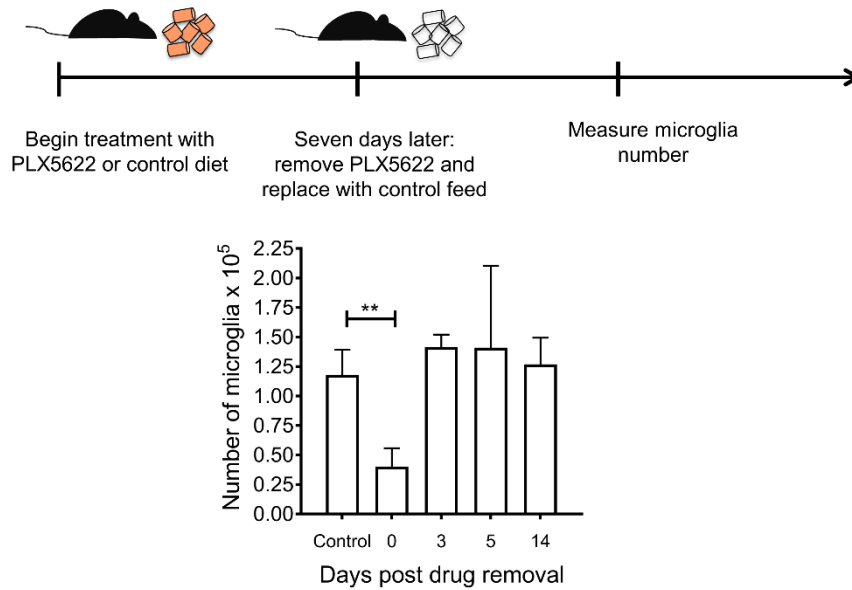

**Figure S3. Microglia recovery after PLX5622 removal.** Mice were treated with PLX5622 for 7 days and then PLX5622-containing food was replaced with control feed. Microglia numbers were measured by flow cytometry at day 0, 3, 5, and 14 post-removal of PLX5622. Data are from 3 mice per group. \*\*\*  $p < 0.001$  by Mann-Whitney U.

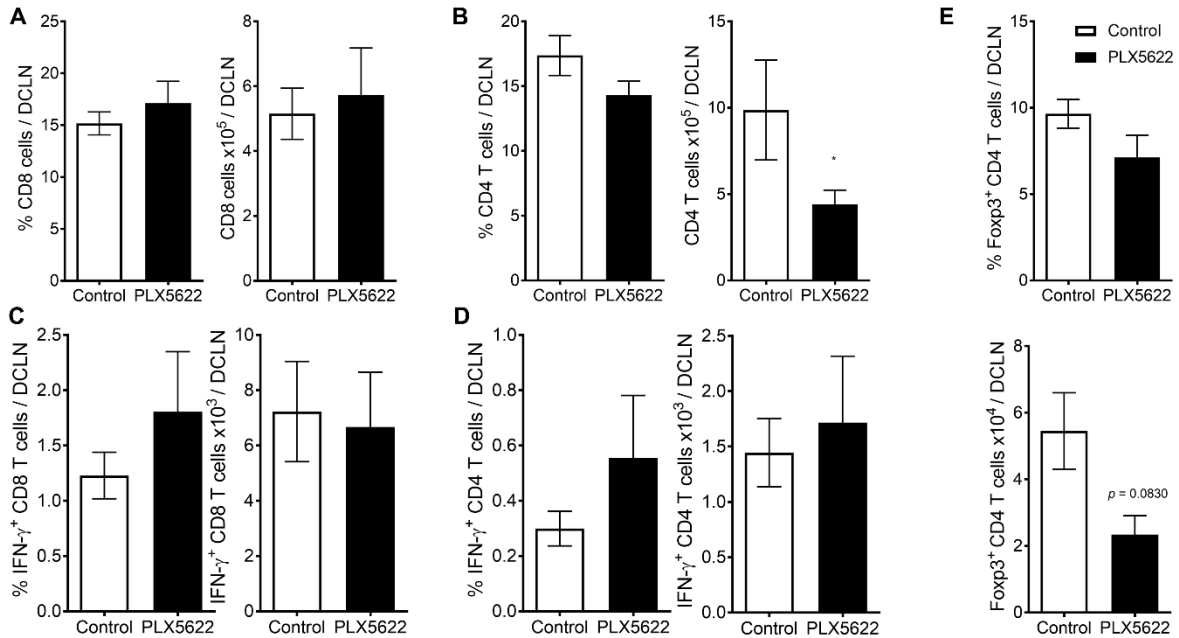

**Figure S4. Altered CD4 T cell response in the DCLN after microglia depletion.** Mice were treated with PLX5622 for 7 days prior to intracranial MHV infection and immune cells in the DCLNs were assessed by flow cytometry at day 7 p.i. Frequency and number of CD8 T cells (A), CD4 T cells (B) and Tregs (E) in the DCLN. Virus-specific CD8 and CD4 T cell frequency and number determined by IFN- $\gamma$  ICS after stimulation with S510 peptide (C) or M133 peptide (D), respectively. Data represent combined data from 3 independent experiments with a total of seven-eight mice per group. \* $p < 0.05$ , as assessed by Mann-Whitney U test.

Table S1. List of primers

| <b>Gene</b>    |     | <b>Primers</b>               |
|----------------|-----|------------------------------|
| mHPRT          | Fwd | 5'-gcgtcgtgattagcgatgatg     |
|                | Rev | 5'-ctcgagcaagtctttcagtc      |
| gRNA           | Fwd | 5'-agggagtttgaccttggtcag     |
|                | Rev | 5'-ataatgcacctgtcatcctcg     |
| IFN $\alpha$ 4 | Fwd | 5'-tccatcagcagctcaatgac      |
|                | Rev | 5'-aggaagagagggctctccag      |
| IFN $\beta$    | Fwd | 5'-tcagaatgagtggtggttc       |
|                | Rev | 5'-gaccttcaaatgcagtagattca   |
| IL-6           | Fwd | 5'-gctaccaaactggatataatcagga |
|                | Rev | 5'-ccaggtagctatggtactccagaa  |
